# Supplementary material
Source: publisher site journal article supplement (https://www.dovepress.com/article/546832)
Supplement: Supplementary file 1 [file 546832-supplementary-table-s1_1.docx]

**Supplementary Table S1 Baseline characteristics of CD patients grouped by Masson’s staining ratio**

| Variable | Masson Staining < median (n=23) | Masson Staining > median (n=41) | P-value |
| --- | --- | --- | --- |
| Median Masson's staining area (IQR) | 33.25% (29.18%, 37.47%) | 47.29% (42.81%, 51.22%) | 0.037 |
| Mean Age (years) | 32.20 ± 5.13 | 36.88 ± 3.60 | 0.048 |
| Gender (Male, %) | 18 (78.26%) | 27 (68.85%) | 0.297 |
| Duration Since CD Diagnosis (years) | 7.66 ± 2.12 | 9.65 ± 2.43 | 0.040 |
| Location (%) |  |  | 0.247 |
| Small intestine | 10 (29.41%) | 24 (70.59%) |  |
| Colon | 13 (43.33%) | 17 (56.66%) |  |
| Biologic/Immunosuppressive Use (n, %) | 15 (65.22%) | 21 (51.22%) | 0.279 |
| Previous Surgery (n, %) | 5 (21.74%) | 14 (34.15%) | 0.297 |
| Reason for Surgery (n, %) |  |  | 0.690 |
| Stricture-related symptoms | 14 (60.87%) | 27 (65.85%) |  |
| Other reasons (diagnosis or fistula) | 9 (39.13%) | 14 (34.15%) |  |
| Time interval from CD Diagnosis to Surgery (years) | 6.22 ± 1.41 | 8.90 ± 3.12 | 0.047 |
